# Supplementary material for: Echinacea purpurea and osteopathic manipulative treatment in children with recurrent otitis media: a randomized controlled trial
Source: PubMed Central journal article supplement (PMC2573879; doi:10.1186/1472-6882-8-56), 2008-10-02

***Echinacea purpurea* and cranial osteopathic manipulative treatment in children with recurrent otitis media: a randomized controlled trial**

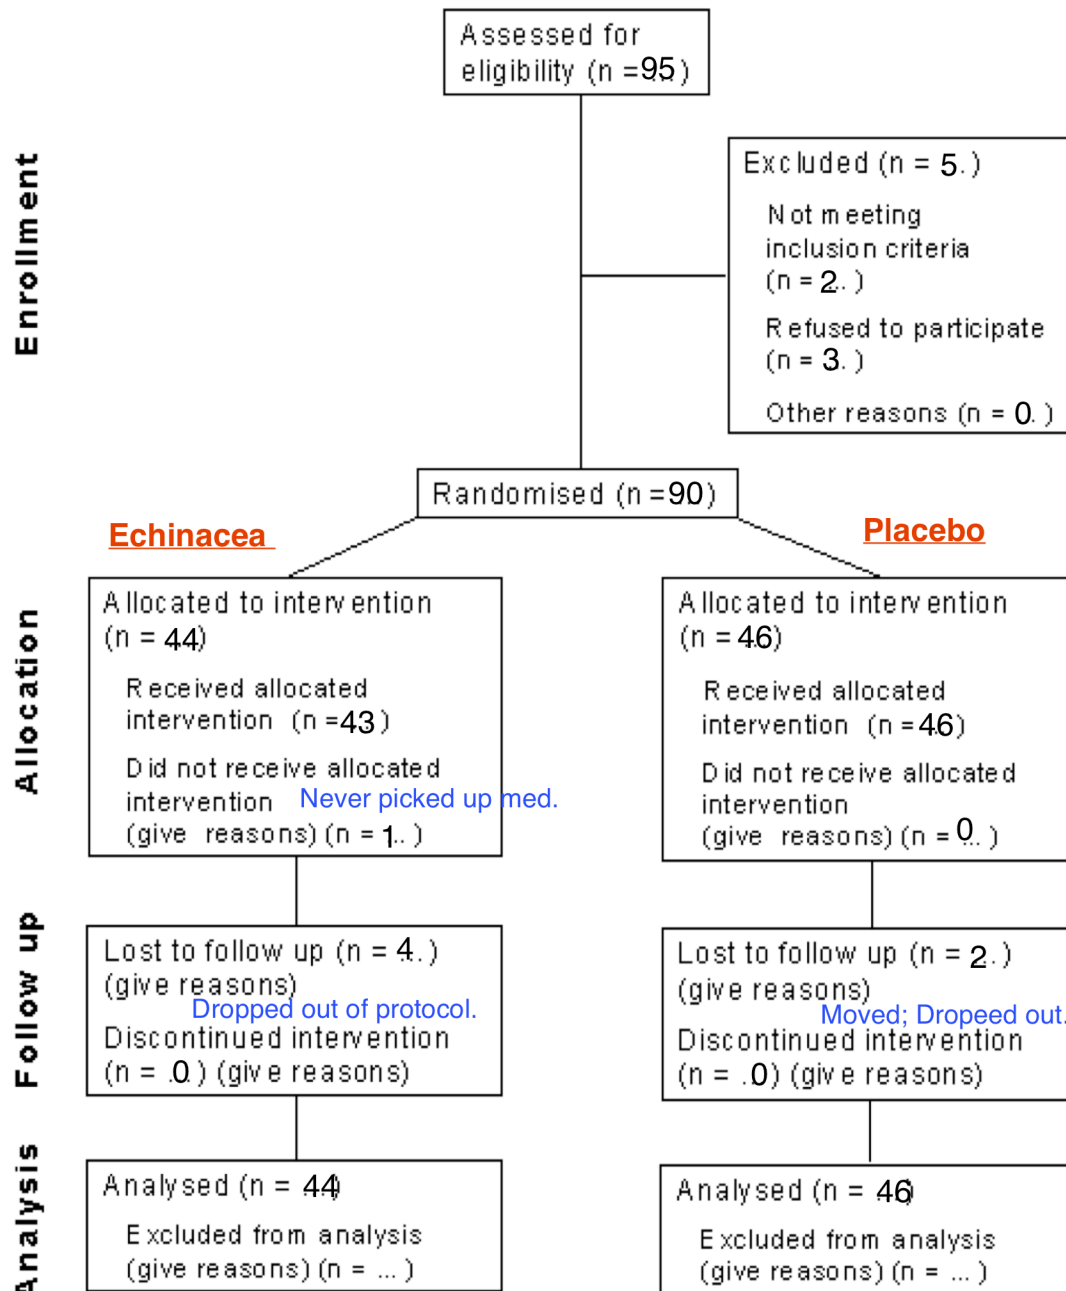

(Continued next page.)

***Echinacea purpurea* and cranial osteopathic manipulative treatment in children with recurrent otitis media: a randomized controlled trial**

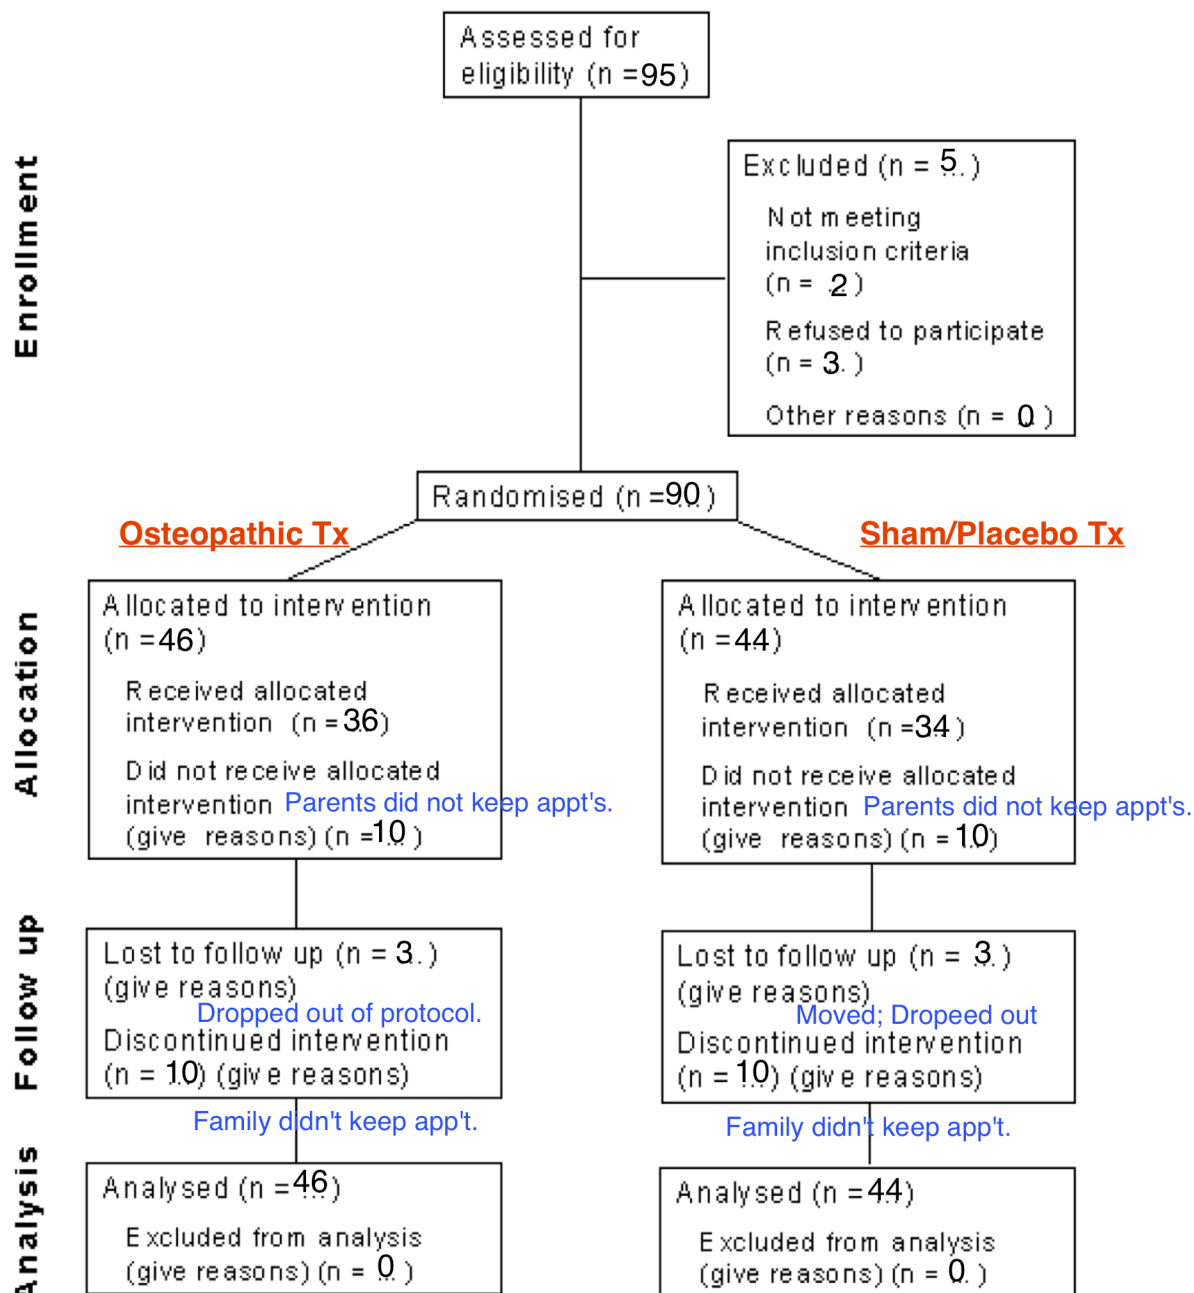

Supplement: 1472-6882-8-56-S1.pdf [file 1472-6882-8-56-S1.pdf]
